# Supplementary material for: Discovery of putative tumor suppressors from CRISPR screens reveals rewired lipid metabolism in acute myeloid leukemia cells
Source: PubMed Central journal article supplement (PMC8586352; doi:10.1038/s41467-021-26867-8), 2021-11-11
Supplement: 41467_2021_26867_MOESM1_ESM.pdf [file 41467_2021_26867_MOESM1_ESM.pdf]

**Inventory of Supporting Information:**

**Supplementary Data S1 – Supp\_Data\_1.zip**

**Supplementary Data S2 – Supp\_Data\_2.txt**

**Supplementary Data S3 – Supp\_Data\_3.csv**

**Supplementary Data S4 – Supp\_Data\_4.xlsx**

**Supplementary Data S5 – Supp\_Data\_5.xlsx**

**Supplementary Data S6 – Supp\_Data\_6.csv**

**Supplementary Data S7– Supp\_Data\_7.csv**

**Source Data – Source\_Data.xlsx**

**Supplementary Figure 1 – Supp\_Fig1.pdf**

**Supplementary Figure 2 – Supp\_Fig2.pdf**

**Supplementary Figure 3 – Supp\_Fig3.pdf**

**Supplementary Figure 4 – Supp\_Fig4.pdf**

**Supplementary Figure 5 – Supp\_Fig5.pdf**

**Supplementary Figure 6 – Supp\_Fig6.pdf**

**Supplementary Figure 7 – Supp\_Fig7.pdf**

**Supplementary Figure 8 – Supp\_Fig8.pdf**

**Supplementary Figure 9 – Supp\_Fig9.pdf**

**Supplementary Figure 10 – Supp\_Fig10.pdf**

## **Supplementary Data**

**Data S1. Mixed Distribution Model Z-Score Matrix.** 808 cell line vs 18,111 gene matrix of mixed Z-score derived from log fold-change fitness scores.

**Data S2. COSMIC TSG PS Statistics.** Statistics of 116 COSMIC TSG genes when observed as a PS, vs other available data points. Includes number of times TSG is observed as a PS gene (count), mean and median TPM expression when observed as a PS gene and additional backgrounds (PS\_Mean\_Exp, Other\_Mean\_Exp, PS\_Median\_Exp, Other\_Median\_Exp), and non-silent mutation rate as a PS gene and additional backgrounds (PS\_mut, Other\_mut). Additionally includes a column of fisher's exact test comparing mutated vs non mutated observations, and a Wilcox test comparing expression levels for each gene.

**Data S3. PSG Co-PS network.** Network of PSG co-occurrence observations related to **Figures 2c** and **S4c**, including fisher test metrics (p-value and FDR).

**Data S4. enCas12a Screen Gene Selection and Rationale.** Genes used for genetic interaction screening, and associated rationale of genes.

**Data S5. enCas12a Library Design.** Guide library used during genetic interaction screening.

**Data S6. enCas12a Single Gene Knock-Out Measurements.** Z-score of mean Log fold-change.

**Data S7. enCas12a Double Gene Knock-Out Measurements.** Calculated Log fold-change and corresponding GI Scores for each gene pair.

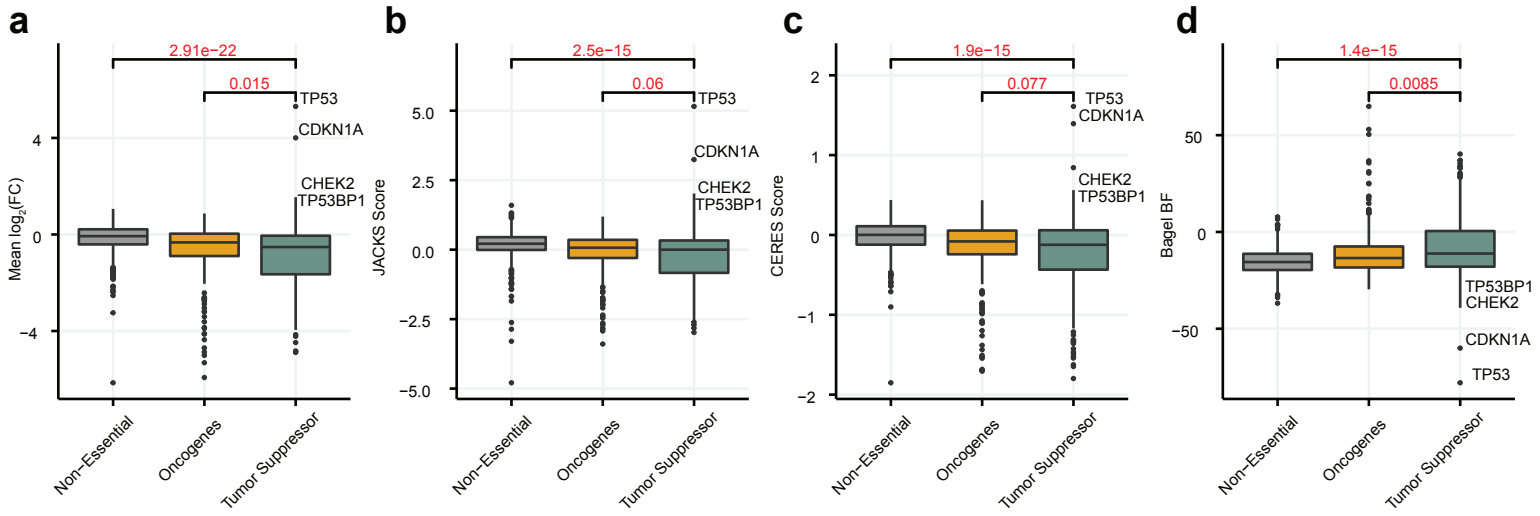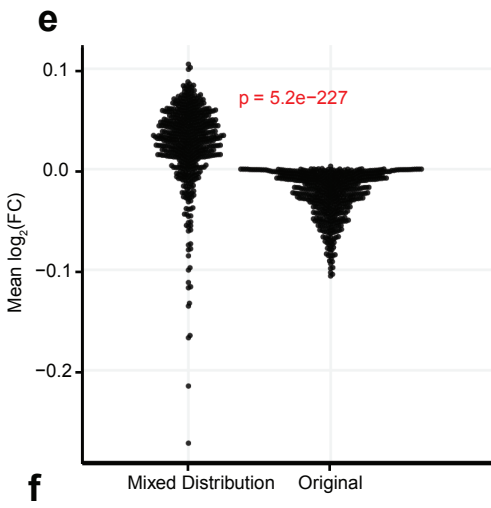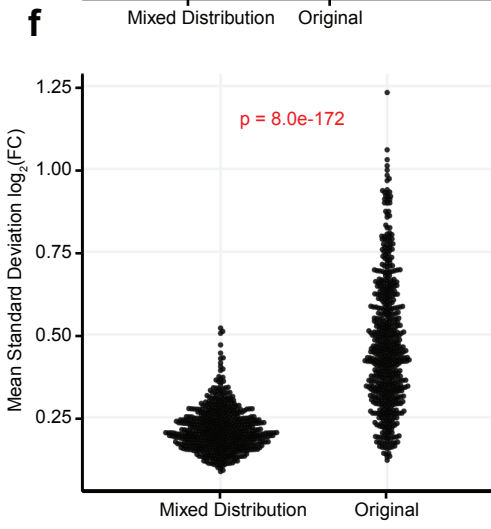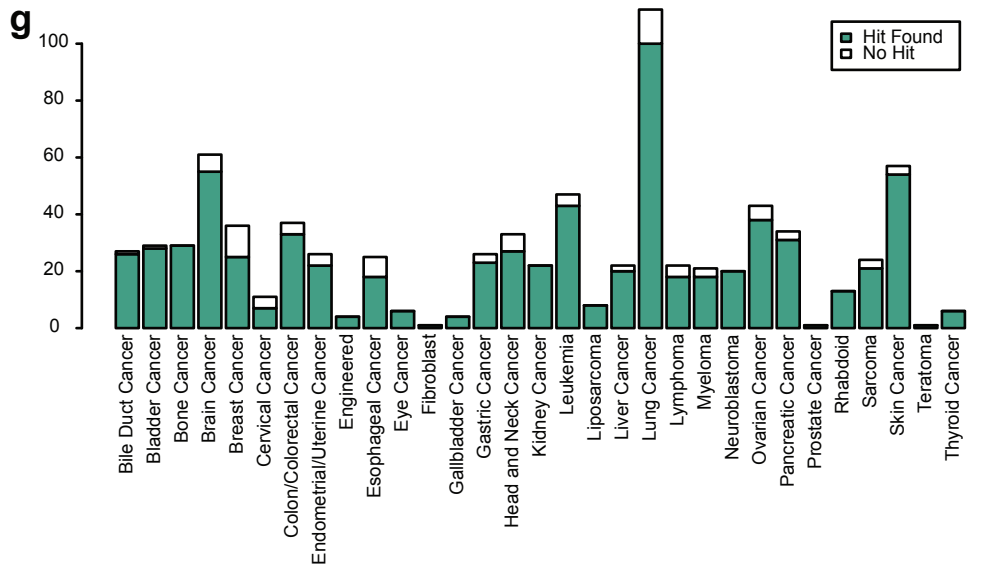

## Supplementary figure legends

**Figure S1. Discovery of Proliferation Suppressor genes extended.** Fitness scoring distributions of non-essential genes, and non-overlapping COSMIC defined oncogenes and tumor suppressor genes; (a) mean log fold-change, Non-Essential min = -6.14, max = 1.06, Q1-1.5\*IQR (lower whisker) = -1.32, 25<sup>th</sup> percentile (%) = -0.41, median = -0.07, 75<sup>th</sup>% = 0.21, Q3+1.5IQR (upper whisker) = 1.06, Oncogenes min = -5.92, max = 0.87, lower whisker = -2.04, 25<sup>th</sup>% = -0.90, median = -0.33, 75<sup>th</sup>% = 0.04, upper whisker = 0.87, Tumor Suppressors min = -4.89, max = 5.30, lower whisker = -3.96, 25<sup>th</sup>% = -1.65, median = -0.52, 75<sup>th</sup>% = -0.05, upper whisker = 1.55, (b) JACKS, Non-Essential min = -4.80, max = 1.60, lower whisker = -0.69, 25<sup>th</sup>% = -0.01, median = 0.21, 75<sup>th</sup>% = 0.45, upper whisker = 1.13, Oncogenes min = -3.39, max = 1.19, lower whisker = -1.28, 25<sup>th</sup>% = -0.30, median = 0.07, 75<sup>th</sup>% = 0.35, upper whisker = 1.19, Tumor Suppressors min = -2.98, max = 5.15, lower whisker = -2.55, 25<sup>th</sup>% = -0.83, median = 0.00, 75<sup>th</sup>% = 0.33, upper whisker = 2.02, (c) CERES, Non-Essential min = -1.85, max = 0.43, lower whisker = -0.44, 25<sup>th</sup>% = -0.12, median = 0.00, 75<sup>th</sup>% = 0.11, upper whisker = 0.43, Oncogenes min = -1.71, max = 0.43, lower whisker = -0.62, 25<sup>th</sup>% = -0.24, median = -0.08, 75<sup>th</sup>% = 0.05, upper whisker = 0.43, Tumor Suppressors min = -1.79, max = 1.62, lower whisker = -1.17, 25<sup>th</sup>% = -0.43, median = -0.12, 75<sup>th</sup>% = 0.06, upper whisker = 0.56, and (d) BAGEL, Non-Essential min = -36.83, max = 7.82, lower whisker = -31.91, 25<sup>th</sup>% = -19.66, median = -15.54, 75<sup>th</sup>% = -11.27, upper whisker = 1.25, Oncogenes min = -29.64, max = 64.871, lower whisker = -29.64, 25<sup>th</sup>% = -18.35, median = -13.48, 75<sup>th</sup>% = -7.50, upper whisker = 8.22, Tumor Suppressors min = -77.92, max = 40.26, lower whisker = -39.20, 25<sup>th</sup>% = -17.95, median = -11.15, 75<sup>th</sup>% = 0.48, upper whisker = 27.80. Boxplots contain identical number of genes with “Non-Essential” genes (n = 819 unique genes), Oncogenes (n =

236 unique genes), and Tumor Suppressors (n = 311 unique genes). P values indicate significance testing of two-sided Wilcoxon rank-sum test. Selected screen for a-d matches the single screen observed in Figure 1a. (e) Distribution of mean log fold-change of original distribution and mixed distribution. P values indicate significance testing of a two-sided Wilcoxon rank-sum test. (f) Same (e) with mean standard deviation. (g) Bar chart by cell line lineage, where at least 1 PS gene at 10% FDR cutoff identified.

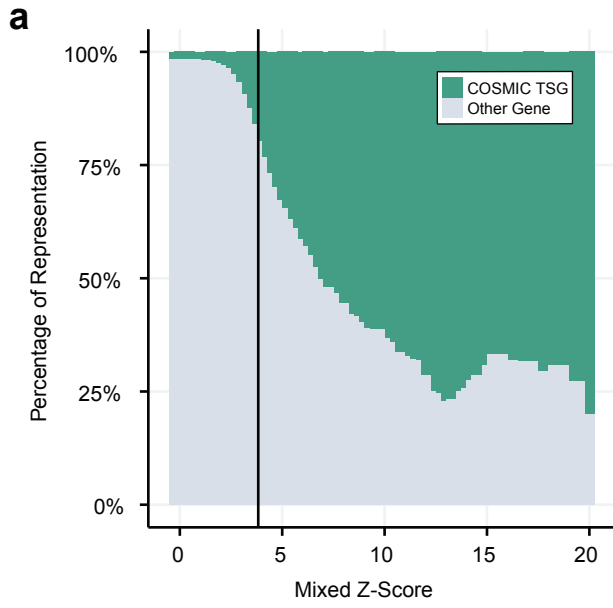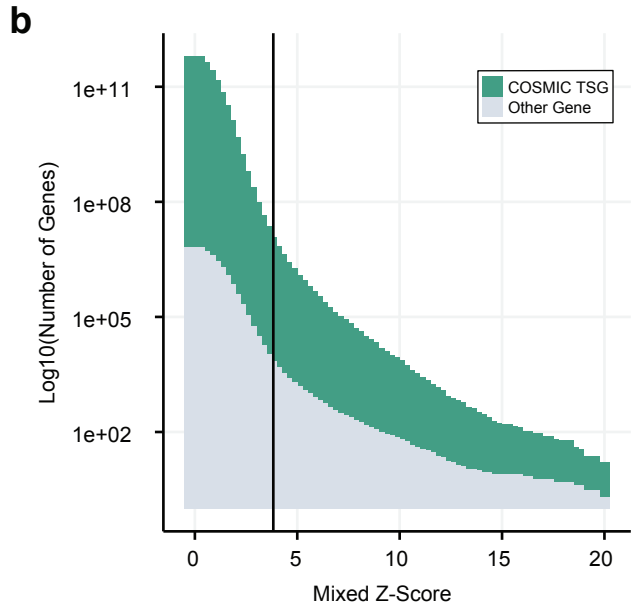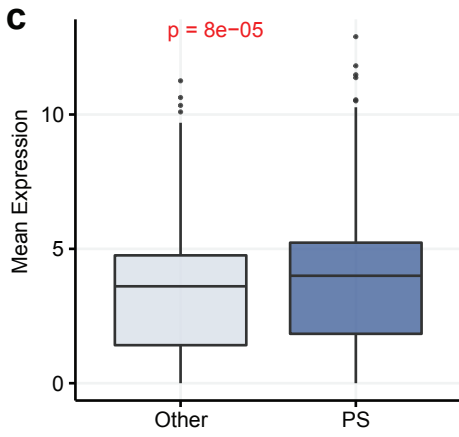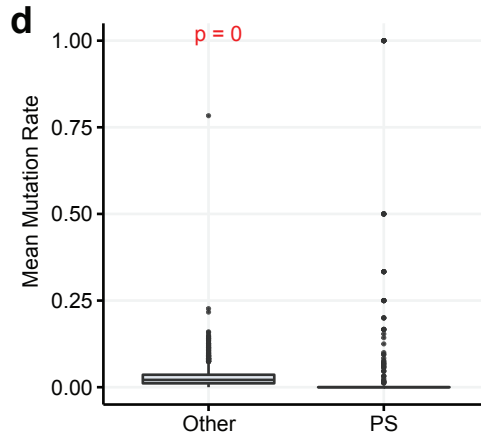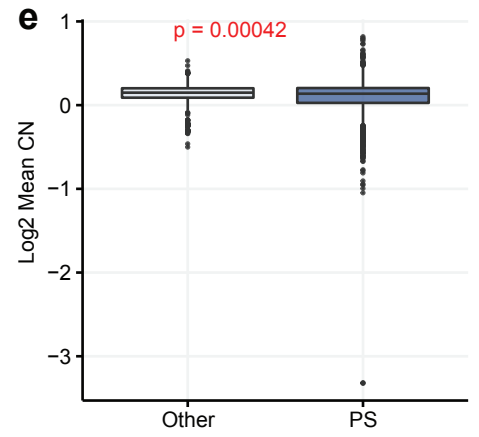

**Figure S2. Proliferation Suppressor Gene Evidence.** (a) Percent representation of COSMIC TSG (green) by corresponding mixed Z-score. (b) Same as (a) with log10 y-axis of number of genes. (c) Mean TPM expression of PSG, grouped by PS observations (blue) vs every other available observation (gray) in which PSG were not observed as a PS. P value represents the corresponding two-sided Wilcoxon rank-sum test. PS observations (blue), n = 1,280 unique genes, min = 0, max = 12.90, Q1-1.5\*IQR (lower whisker) = 0, 25<sup>th</sup> percentile (%) = 1.84, median = 4.00, 75<sup>th</sup>% = 5.23, Q3+1.5IQR (upper whisker) = 10.27. 'Other' observations (gray), n = 1453 unique genes, min = 0, max = 11.25, lower whisker = 0, 25<sup>th</sup>% = 1.42, median = 3.61, 75<sup>th</sup>% = 4.76, upper whisker = 9.69. (d) same as (c) with mutation rate PS observations (blue), n = 1,483 unique genes, min = 0, max = 1, boxplot statistics all = 0, 'Other' observations (gray), n = 1483 unique genes, min = 0, max = 0.78, lower whisker = 0, 25<sup>th</sup>% = 0.01, median = 0.02, 75<sup>th</sup>% = 0.04, upper whisker = 0.07 and (e) copy number PS observations (blue), n = 1,435 unique genes, min = 1.41e-09, max = 1.66, lower whisker = 0.72, 25<sup>th</sup>% = 0.92, median = 1.00, 75<sup>th</sup>% = 1.05, upper whisker = 1.25, 'Other' observations (gray), n = 1457 unique genes, min = 0.61, max = 1.34, lower whisker = 0.83, 25<sup>th</sup>% = 0.96, median = 1.01, 75<sup>th</sup>% = 1.05, upper whisker = 1.18.



**a**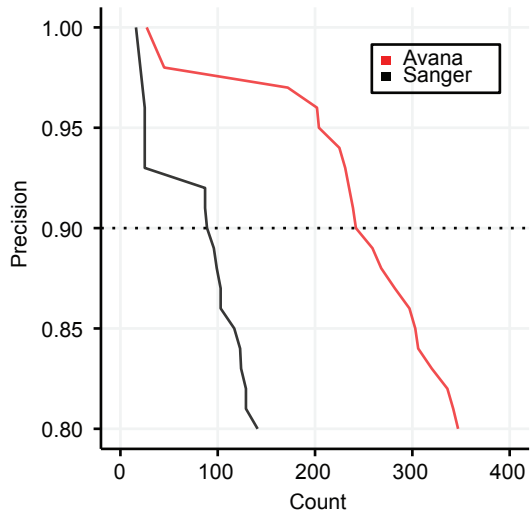**b**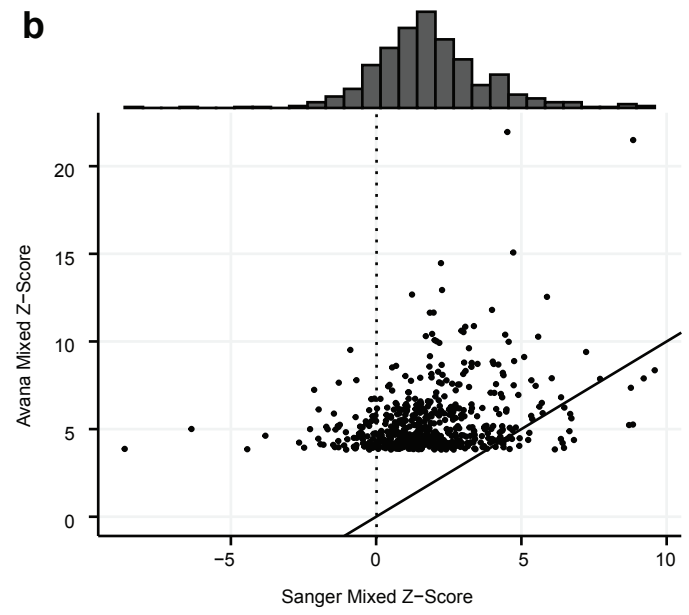

**Figure S3. Avana vs Sanger Genetic Screens Comparison.** (a) Precision vs. count recall of mixed Z-score in matching screens from Avana (red), and Sanger (black). Dashed line represents 90% precision (10% FDR). (b) Avana vs Sanger mixed Z-scores of genes identified as hits in Avana. Dashed line indicates Sanger mixed z-score = 0.

**a**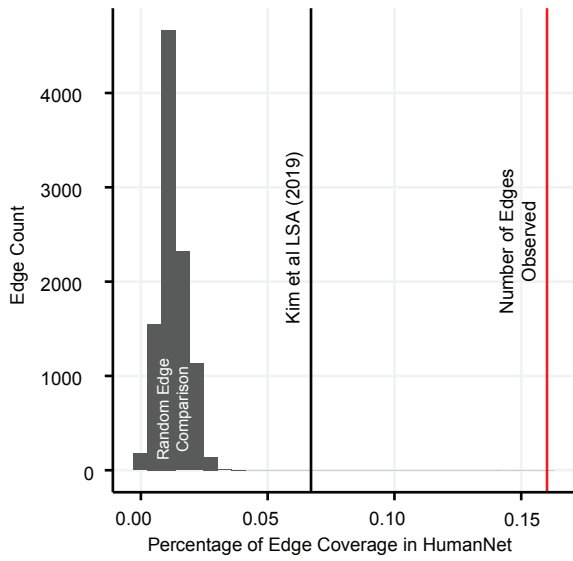**b**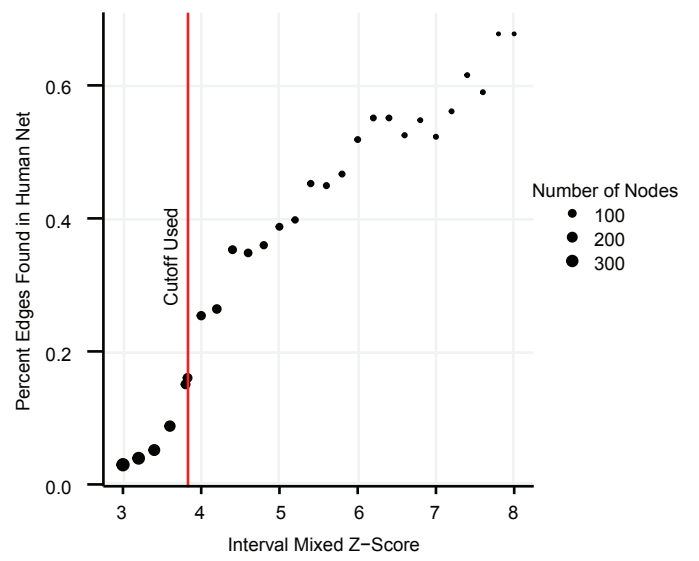**c**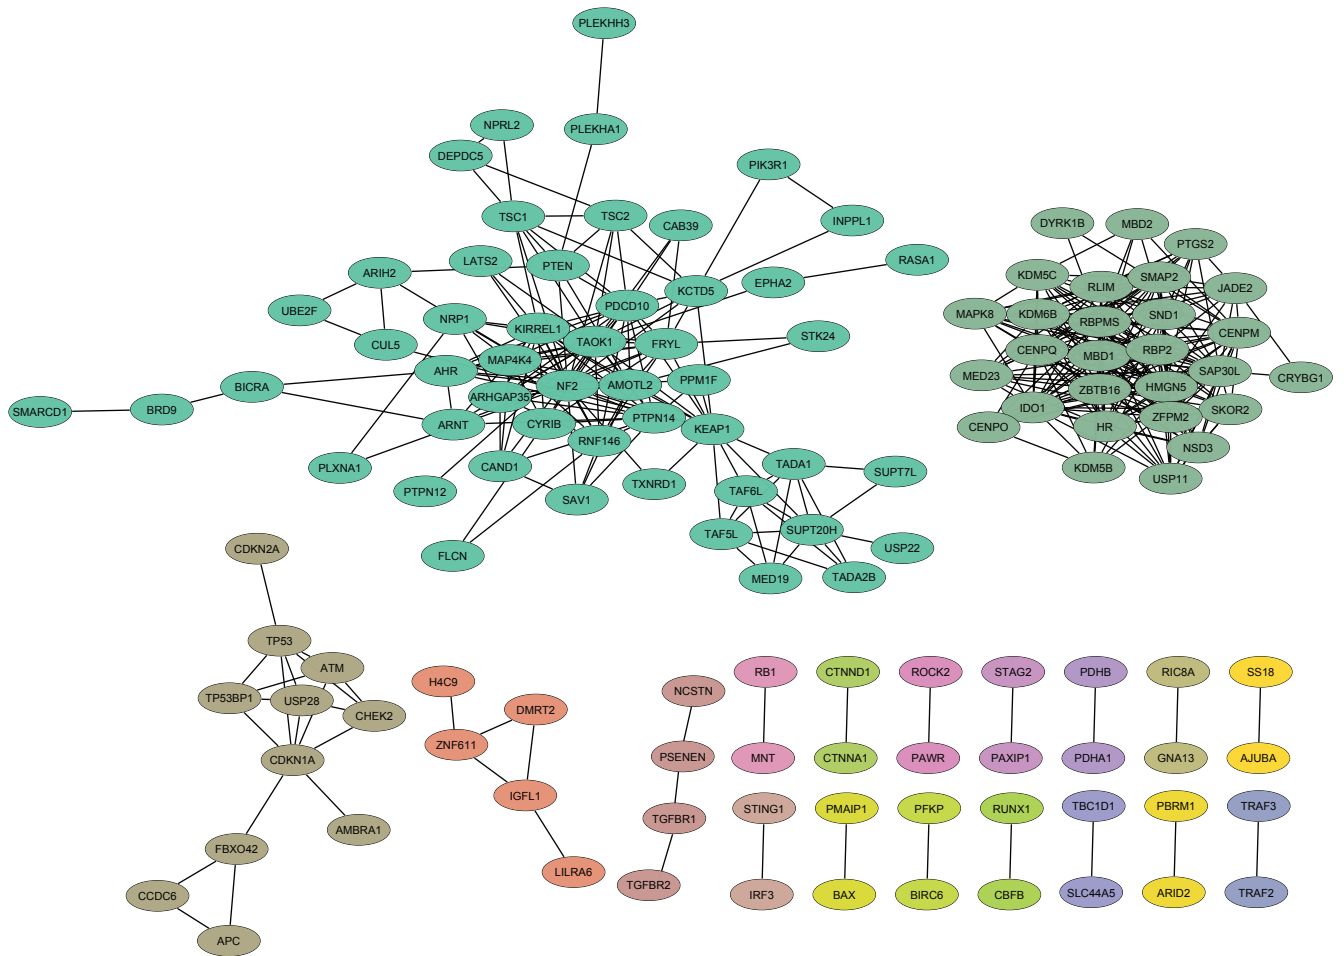

**Figure S4. Co-occurrence of PS genes extended.** (a) Empirical comparison of Co-PS network edges. Distribution represents random edges between genes identified in the network, and the percentage of edges identified in HumanNet with coessentiality network removed. Black line represents the percent of edges identified in the Kim *et al.* coessentiality network. Red line indicates the actual number of edges the Co-PS contains that are observed in HumanNet with coessentiality network removed. (b) Percent of edge coverage observed in HumanNet with coessentiality network removed against Co-PS edge FDR < 0.1% networks at iterative label mixed Z-score cutoffs. Red line indicates actual cutoff used. (c) Remaining modules from the Co-PS network not included in Figure 2c. Clusters are colored uniquely to demonstrate distinctions between gene modules.

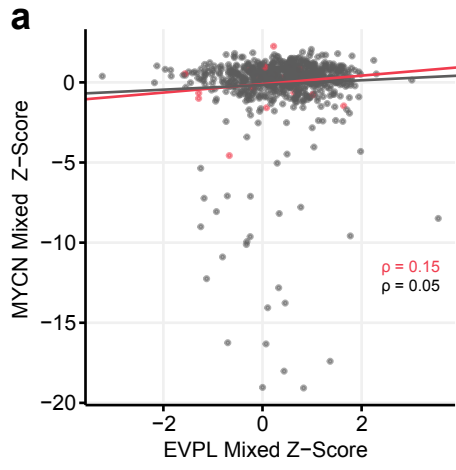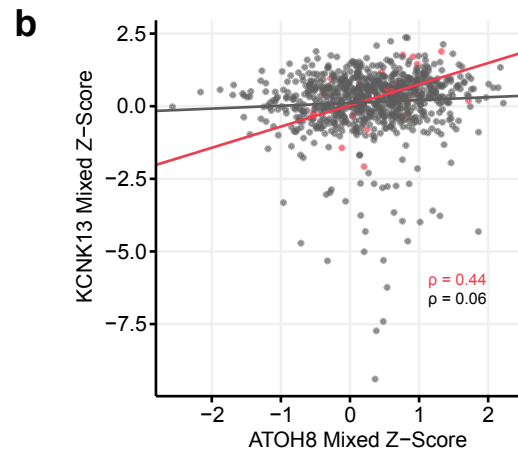

**Figure S5. Examples of high dPCC resulting from data noise.** (a) EVPL vs MYCN mixed Z-scores. Red indicates AML only observations, while gray indicates observations in all other cells. (b) same as (a) for ATOH8 vs. KNCK13 mixed Z-scores. Values plotted represent correlation ( $\rho$ ) of plotted points.

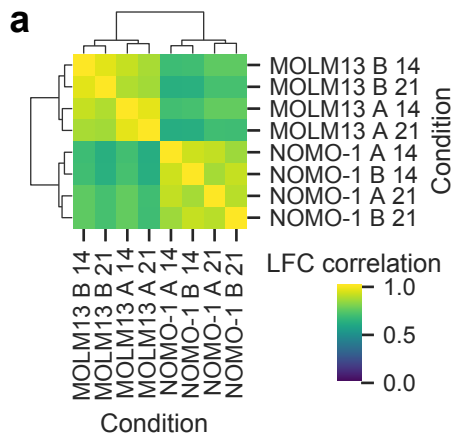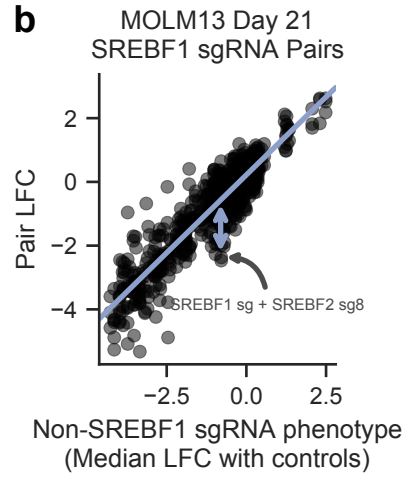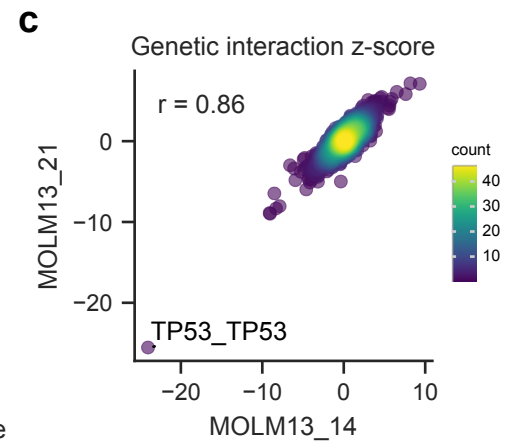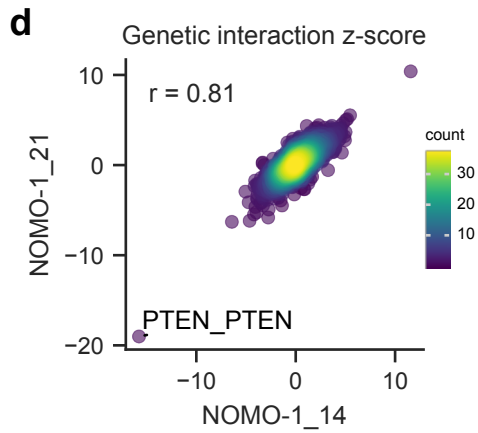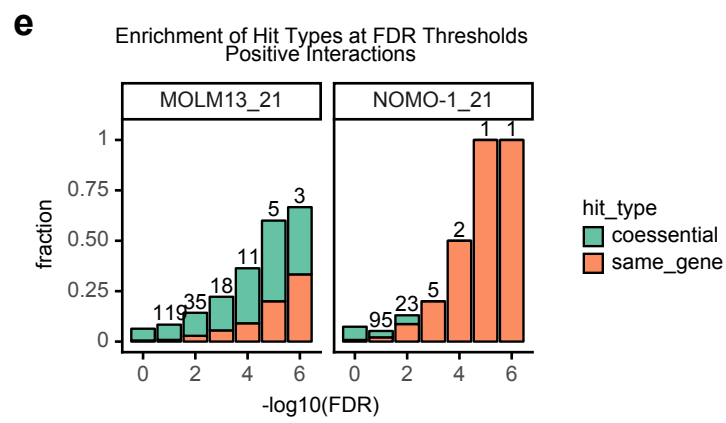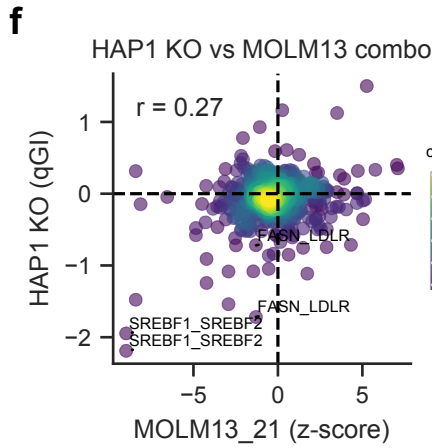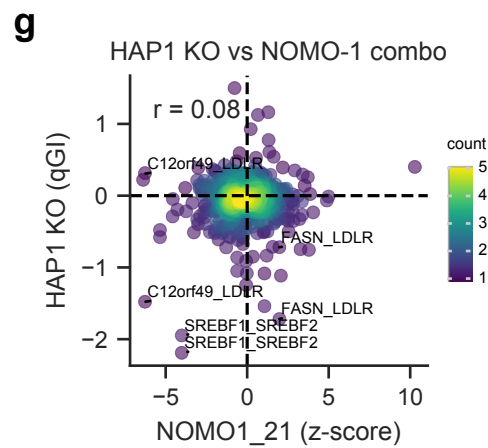

**Figure S6. Combinatorial screen QC.** (a) Replicate correlations. (b) Example calculation of residuals. (c) Correlation between genetic interaction scores for MOLM13. (d) same as (c) for NOMO1. (e) Fraction of coessential pairs or pairs that target the same gene at different FDR cutoffs for interactions with positive z-scores. (f) Comparison with qGI scores from Aregger *et al.*<sup>1</sup> for MOLM13. (g) Same as (f) for NOMO1.



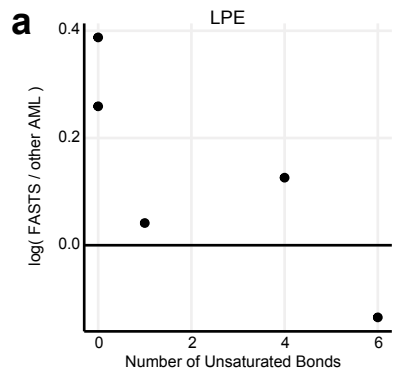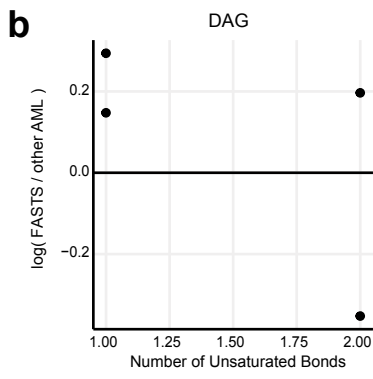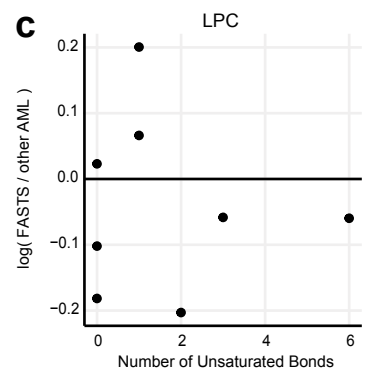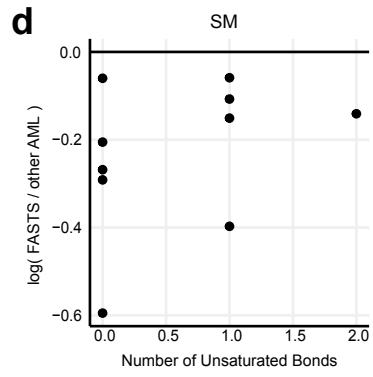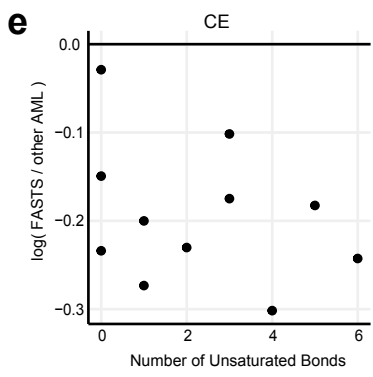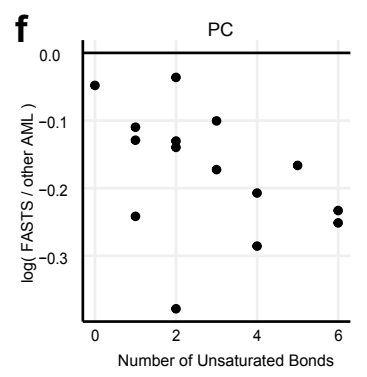

**Figure S7. Additional metabolite comparisons.** (a) Lysophosphatidylethanolamine (LPE) species metabolite difference. The x axis represents the median difference of log<sub>10</sub> normalized peak area of the metabolite in FASTS cells vs all other AML cells. The y axis represents the number of saturated bonds present. Each dot represents a unique metabolite. (b) same for diacylglycerol (DAG), (c) lysophosphatidylcholine (LPC), (d) sphingomyelin (SM), (e) cholesterol ester (CE), and (f) phosphatidylcholine (PC) species.

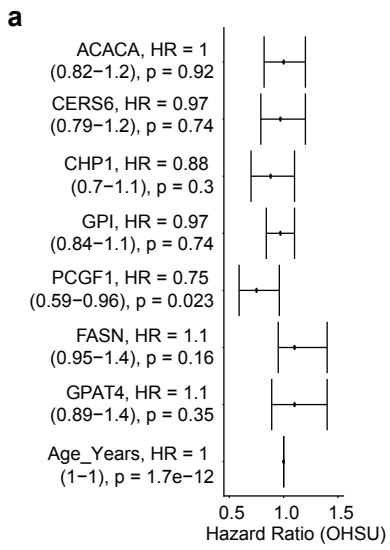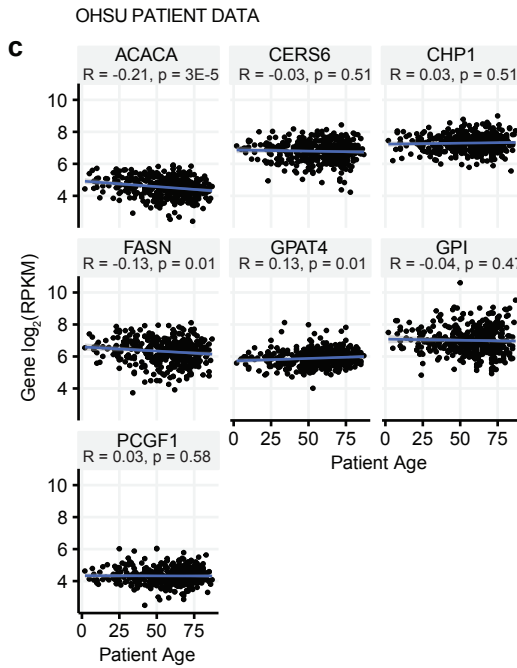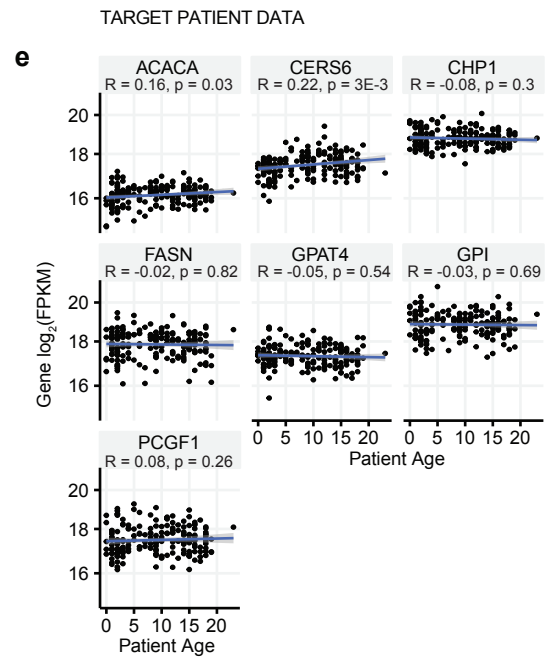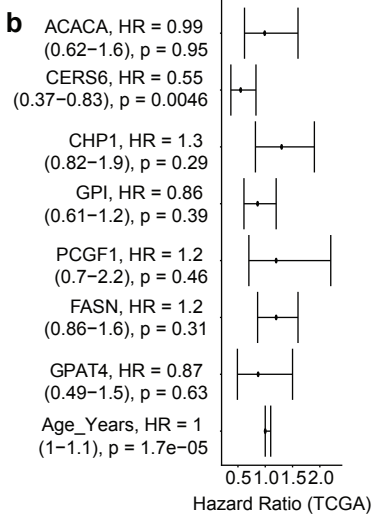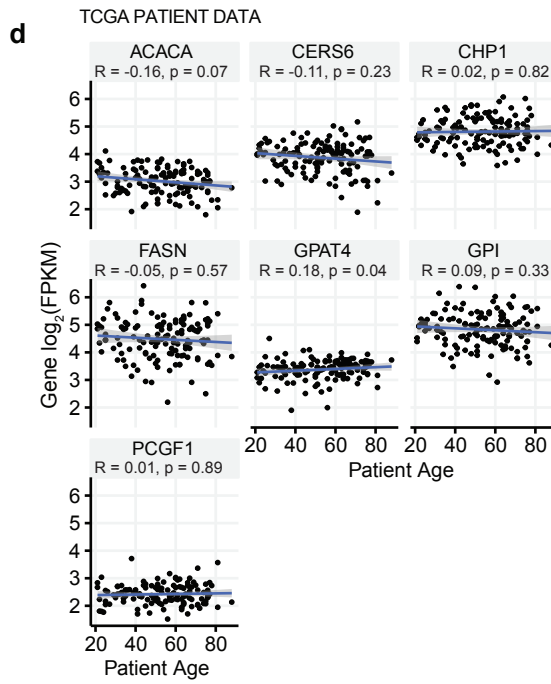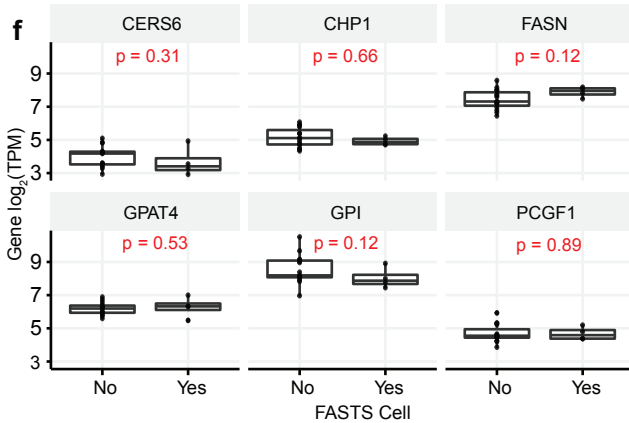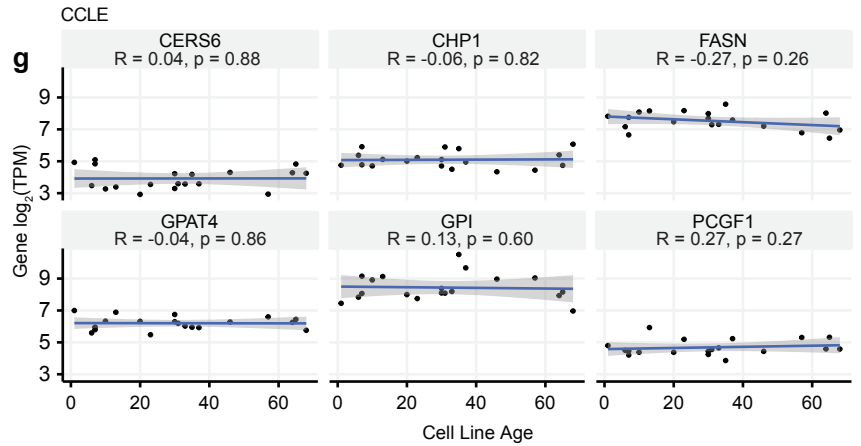

**Figure S8. Comparisons of FAS genes against age in AML patient data.** Hazard ratio calculations for FAS cluster genes in AML patient data coming from (a) OHSU - Tyner *et al.*, and (b) TCGA LAML. The dots plotted in S8a and S8b represents the HR value indicated on the right. The 95% CI range for each point is indicated on the left. Spearman correlations of patient age against FAS gene expression in (c) OHSU, Tyner *et al.*, (d) TCGA LAML, and (e) GDC TARGET AML. (f) Boxplots of FAS gene expression in FASTS AML, n = 4 biologically independent cell lines, and non-FASTS AML, n = 15 biologically independent cell lines from CCLE. All p-values denote two-sided Wilcoxon rank-sum test. For *CERS6* FASTS = No, min = 2.94, max = 5.10, Q1-1.5\*IQR (lower whisker) = 2.94, 25<sup>th</sup> percentile (%) = 3.52, median = 4.18, 75<sup>th</sup>% = 4.29, Q3+1.5IQR (upper whisker) = 5.10, FASTS = Yes, min = 2.92, max = 4.93, lower whisker = 2.92, 25<sup>th</sup>% = 3.09, median = 3.41, 75<sup>th</sup>% = 4.24, upper whisker = 4.93. For *CHPI* FASTS = No, min = 4.34, max = 6.07, lower whisker = 4.34, 25<sup>th</sup>% = 4.73, median = 5.11, 75<sup>th</sup>% = 5.60, upper whisker = 6.07, FASTS = Yes, min = 4.71, max = 5.23, lower whisker = 4.71, 25<sup>th</sup>% = 4.73, median = 4.88, 75<sup>th</sup>% = 5.12, upper whisker = 5.23. For *FASN* FASTS = No, min = 6.45, max = 8.58, lower whisker = 6.45, 25<sup>th</sup>% = 7.06, median = 7.31, 75<sup>th</sup>% = 7.87, upper whisker = 8.58, FASTS = Yes, min = 7.48, max = 8.17, lower whisker = 7.48, 25<sup>th</sup>% = 7.65, median = 7.95, 75<sup>th</sup>% = 8.13, upper whisker = 8.17. For *GPAT4* FASTS = No, min = 5.59, max = 6.89, lower whisker = 5.59, 25<sup>th</sup>% = 5.94, median = 6.19, 75<sup>th</sup>% = 6.37, upper whisker = 6.89, FASTS = Yes, min = 5.48, max = 7.00, lower whisker = 5.48, 25<sup>th</sup>% = 5.90, median = 6.32, 75<sup>th</sup>% = 6.66, upper whisker = 7.00. For *GPI* FASTS = No, min = 6.97, max = 10.51, lower whisker = 6.97, 25<sup>th</sup>% = 8.08, median = 8.19, 75<sup>th</sup>% = 9.08, upper whisker = 10.51, FASTS = Yes, min = 7.45, max = 8.91, lower whisker = 7.45, 25<sup>th</sup>% = 7.60, median = 7.87, 75<sup>th</sup>% = 8.45, upper whisker = 8.91. For *PCGFI* FASTS = No, min = 3.86, max = 5.93, lower whisker = 3.86, 25<sup>th</sup>% = 4.44, median = 4.55, 75<sup>th</sup>% = 4.95, upper

whisker = 5.32, FASTS = Yes, min = 4.38, max = 5.19, lower whisker = 4.38, 25<sup>th</sup>% = 4.38, median = 4.59, 75<sup>th</sup>% = 4.99, upper whisker = 5.19 (g) Spearman correlations of patient derived cell line age against FAS gene expression, coming from data in CCLE. *ACACA* is not included in (g) as it was not found in the CCLE expression data used in prior analysis. Shaded areas in (c),(d), (e), and (g) represent 95% CI of fitted line.

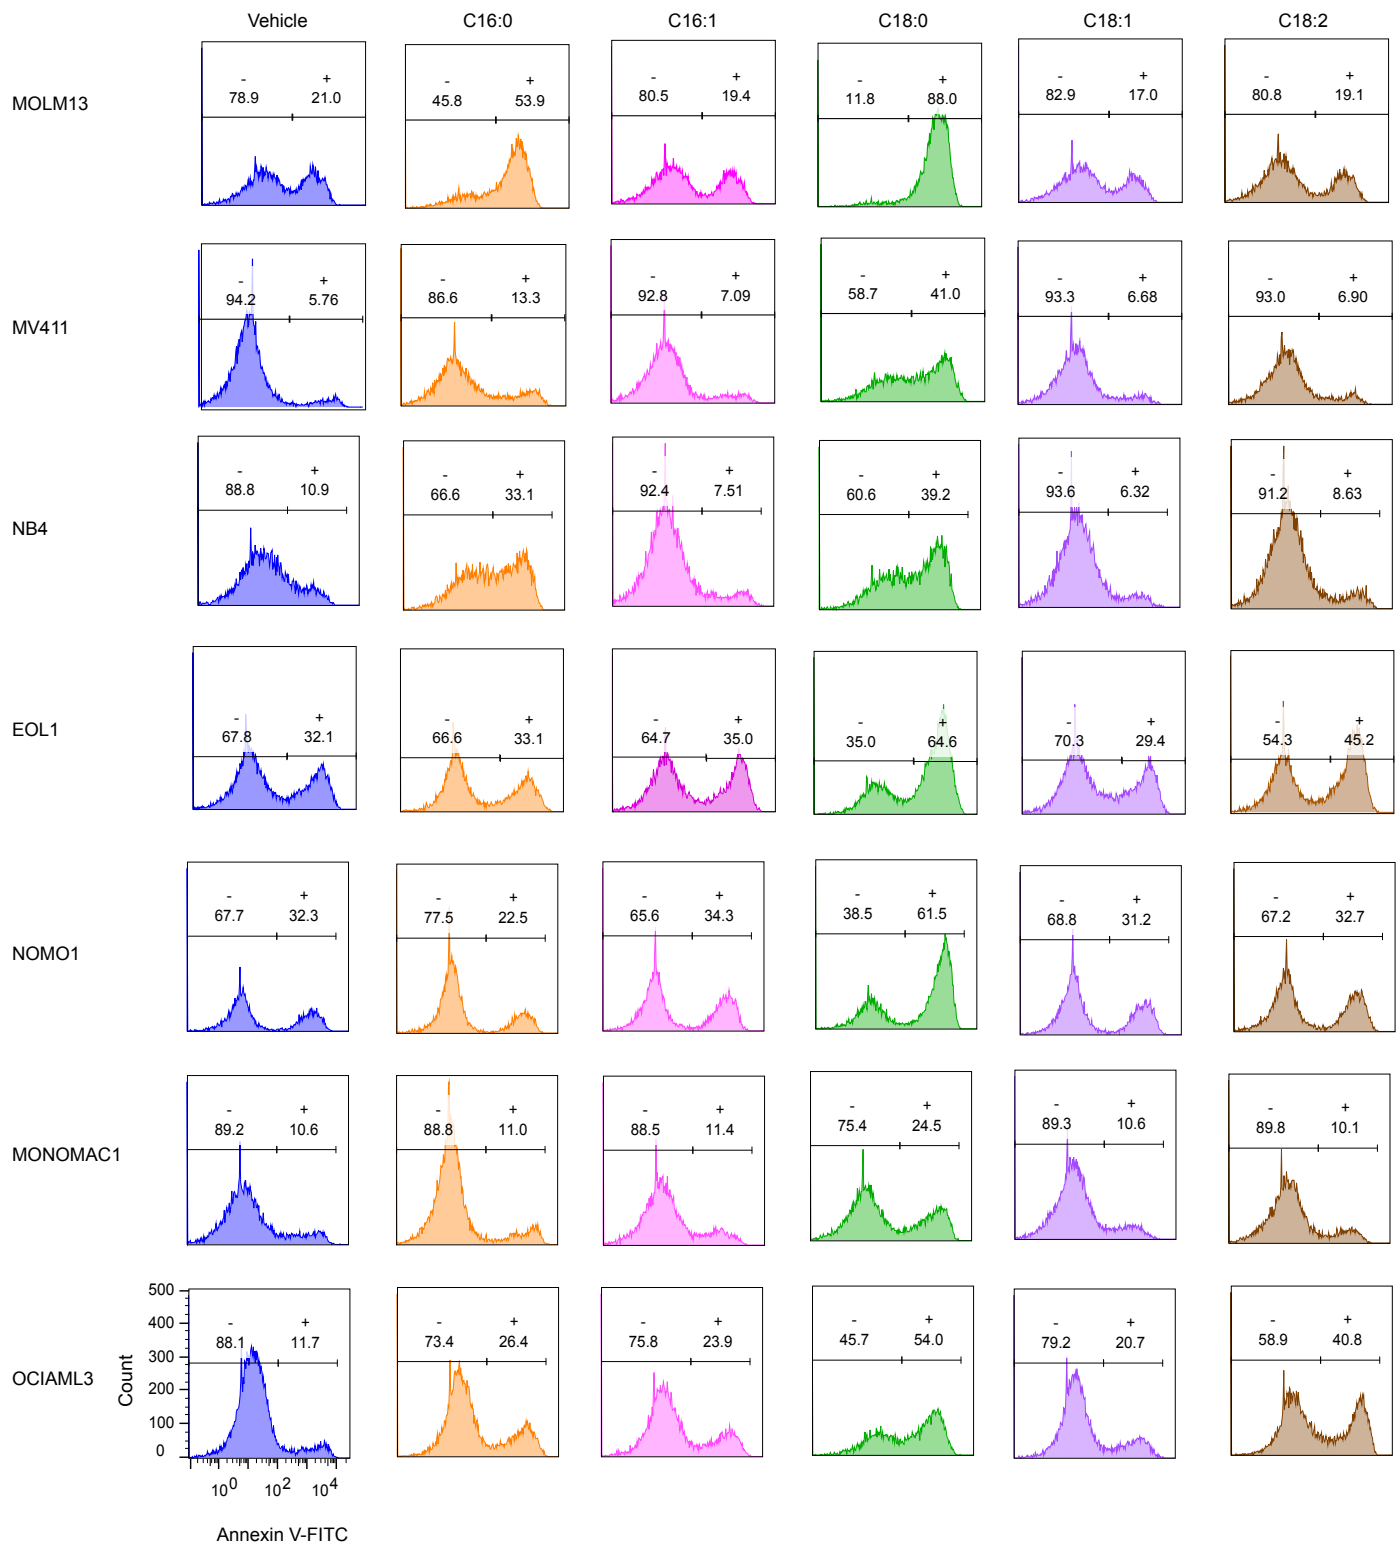

**Figure S9. Sample flow cytometry plots.** A representative flow cytometry data used to create bar graphs shown in figure 5b-c. Rows indicate which specific cell lines from figure 5b-c are used, and columns represent the various conditions used. Each plot represents a single dot from figure 5b-c.

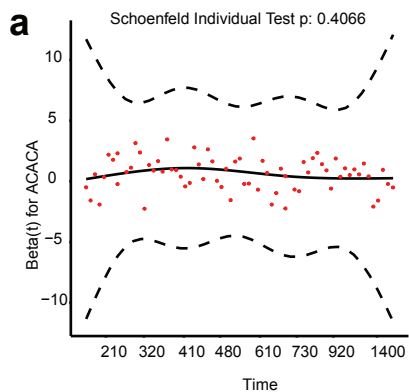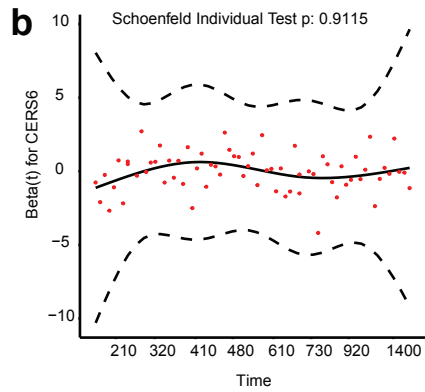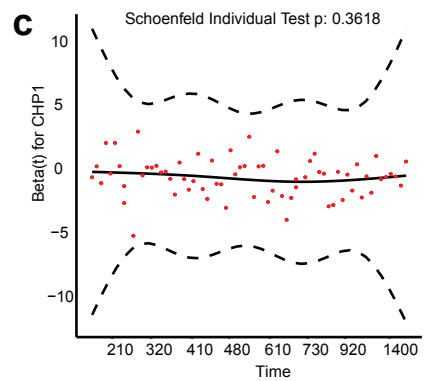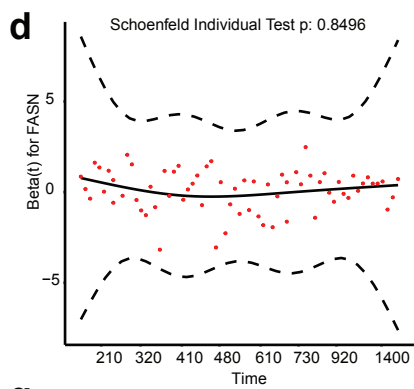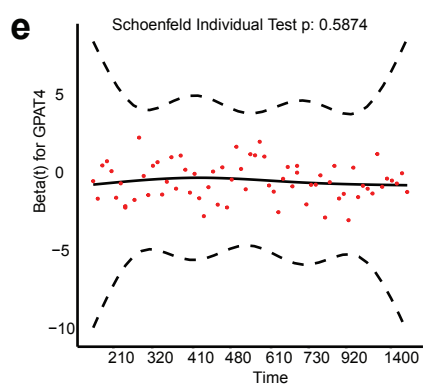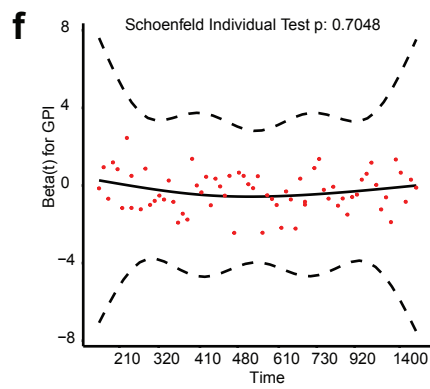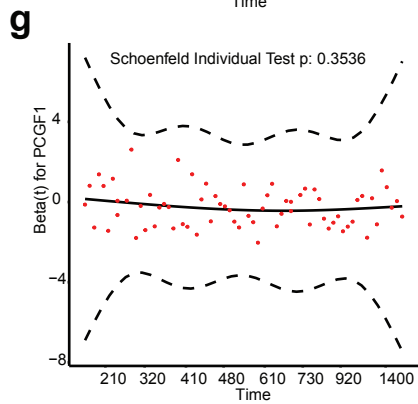



**Figure S10. Testing the Cox Proportional Hazards Assumption.** Assessing the Cox proportional hazards assumption with Schoenfeld tests of all genes in Figure 6d; (a) *ACACA*, (b) *CERS6*, (c) *CHP1*, (d) *FASN*, (e) *GPAT4*, (f) *GPI*, (g) *PCGF1*.

## Supplemental References

1. Aregger, M. *et al.* Systematic mapping of genetic interactions for de novo fatty acid synthesis identifies C12orf49 as a regulator of lipid metabolism. *Nature Metabolism* **2**, 499–513 (2020).
